# Supplementary material for: The reaction between CO2 and chloroform in anion-functionalized ionic liquids with the formation of trichloroacetates
Source: Royal Society of Chemistry journal article supplement (doi:10.1039/d5cc00786k), 2025-01-01
Supplement: d5cc00786k1.pdf [file d5cc00786k1.pdf]

## Supporting information

The reaction between CO<sub>2</sub> and chloroform in anion-functionalized ionic liquids with the formation of trichloroacetates

Mingzhe Chen, Congyi Wu, and Dezhong Yang \*

School of Science, China University of Geosciences, Beijing 100083, China

Corresponding author:

Dezhong Yang, Email: yangdz@cugb.edu.cn

## Experimental Sections

### Materials and Characterization

N-ethyl-N,N-dimethyl-N-(2-methoxyethyl)ammonium bromide ([MOEN<sub>211</sub>][Br], 99%) was purchased from Lanzhou Green Chemistry Co. Ltd. CHCl<sub>3</sub> (99%), imidazole (98%), pyrazole (98%), and 1,2,4-triazole (98%) were purchased from Innochem (Beijing) China. CO<sub>2</sub> (99.995%) and N<sub>2</sub> (≥99.99%) were supplied from Beijing ZG Special Gases Science Co. Ltd. (Beijing, China). Ambersep 900(OH) ion exchange resin was obtained from Alfa Aesar. FTIR spectra were collected on a Nicolet 6700 spectrometer with an attenuated total reflection (ATR) accessory. <sup>1</sup>H NMR (400 MHz) and <sup>13</sup>C NMR (100.6 MHz) spectra were recorded on a Bruker spectrometer with DMSO-*d*<sub>6</sub> or CDCl<sub>3</sub> as the references. When DMSO-*d*<sub>6</sub> was used as the solvent, the chemical shift values were obtained using the peaks of DMSO-*d*<sub>6</sub> (H: 2.50 ppm; C:39.52 ppm) as references. When CDCl<sub>3</sub> was used as the solvent, the peaks of TMS were used as references. When DMSO-*d*<sub>6</sub> and CDCl<sub>3</sub> were both contained in the samples, the peaks of DMSO-*d*<sub>6</sub> (H: 2.50 ppm; C:39.52 ppm) were used as references. CHCl<sub>3</sub> was dried at room temperature by 4Å molecular sieve prior to use.

### Synthesis of ILs

Synthesis of [MOEN<sub>211</sub>][Triz] and [N<sub>2222</sub>][Triz]: The synthesis of [MOEN<sub>211</sub>][Triz] was using the methods reported in the literature with some modifications.<sup>1, 2</sup> At first, the aqueous solution of [MOEN<sub>211</sub>][OH] was obtained by flowing the solution of [MOEN<sub>211</sub>][Br] in water through a column containing the Ambersep 900(OH) ion exchange resin. After that, equimolar 1,2,4-triazole was added into the solution of [MOEN<sub>211</sub>][OH] ([MOEN<sub>211</sub>][OH]: 1,2,4-triazole = 1:1), and above mixture was stirred at room temperature for about 2 hours. Then, [MOEN<sub>211</sub>][Triz] was obtained after removing water in the mixture using a rotary evaporator. [MOEN<sub>211</sub>][Triz] was further dried under vacuum at 70 °C prior to use. The method of synthesizing [N<sub>2222</sub>][Triz] was similar to that of [MOEN<sub>211</sub>][Triz].

The methods of synthesizing [MOEN<sub>211</sub>][Im] and [MOEN<sub>211</sub>][Pyr] were also similar to that of [MOEN<sub>211</sub>][Triz].

## **Absorption of CO<sub>2</sub>**

The CO<sub>2</sub> absorption procedures can be found in our previous work.<sup>3,4</sup> CO<sub>2</sub> was bubbled by a long steel needle into the absorbents (IL or DMSO-*d*<sub>6</sub> solution of IL) contained in a glass tube, and another short needle was used for CO<sub>2</sub> outlet. The weight change of the glass tube before and after CO<sub>2</sub> capture was measured and used to calculate the capacity of absorbents.

## **The preparation of NMR and FTIR samples**

### **The samples of IL+DMSO-*d*<sub>6</sub> and IL+DMSO-*d*<sub>6</sub>+CO<sub>2</sub>:**

The DMSO-*d*<sub>6</sub> solutions of IL before and after CO<sub>2</sub> capture were used directly to record NMR and FTIR spectra. The concentration of [MOEN<sub>211</sub>][Triz] and [N<sub>2222</sub>][Triz] in DMSO-*d*<sub>6</sub> before CO<sub>2</sub> capture was 40 wt% and 20 wt%, respectively.

### **The samples of [MOEN<sub>211</sub>][Triz]+CO<sub>2</sub>+CDCl<sub>3</sub>:**

After the absorption of CO<sub>2</sub> by [MOEN<sub>211</sub>][Triz] reached saturation, CDCl<sub>3</sub> was added into the mixture [MOEN<sub>211</sub>][Triz]+CO<sub>2</sub> to obtain [MOEN<sub>211</sub>][Triz]+CO<sub>2</sub>+CDCl<sub>3</sub>, which was stirred at room temperature for about 20 min. The concentration of [MOEN<sub>211</sub>][Triz] in [MOEN<sub>211</sub>][Triz]+CO<sub>2</sub>+CDCl<sub>3</sub> mixture was about 40 wt%.

The sample of [MOEN<sub>211</sub>][Triz]+CDCl<sub>3</sub> was obtained by mixing [MOEN<sub>211</sub>][Triz] and CDCl<sub>3</sub> at room temperature, and the concentration of [MOEN<sub>211</sub>][Triz] was 40 wt%.

### **The samples of IL+DMSO-*d*<sub>6</sub>+CHCl<sub>3</sub> and IL+DMSO-*d*<sub>6</sub>+CO<sub>2</sub>+CHCl<sub>3</sub>:**

The samples of IL+DMSO-*d*<sub>6</sub>+CHCl<sub>3</sub> were prepared by adding CHCl<sub>3</sub> into IL+DMSO-*d*<sub>6</sub> solutions, and the molar ratio of CHCl<sub>3</sub> to IL was 2:1.

After CO<sub>2</sub> absorption by IL+DMSO-*d*<sub>6</sub> solution reached saturation, CHCl<sub>3</sub> was added into the carbon-captured solution to obtain the mixture IL+DMSO-*d*<sub>6</sub>+CO<sub>2</sub>+CHCl<sub>3</sub>, which was stirred at room temperature for about 20 min. The molar ratio of added CHCl<sub>3</sub> to IL in IL+DMSO-*d*<sub>6</sub>+CO<sub>2</sub> was 2:1.

The method of preparing the sample of [N<sub>2222</sub>][Triz] +DMSO-*d*<sub>6</sub>+CO<sub>2</sub>+CDCl<sub>3</sub> was similar to that of [N<sub>2222</sub>][Triz] +DMSO-*d*<sub>6</sub>+CO<sub>2</sub>+CHCl<sub>3</sub>.

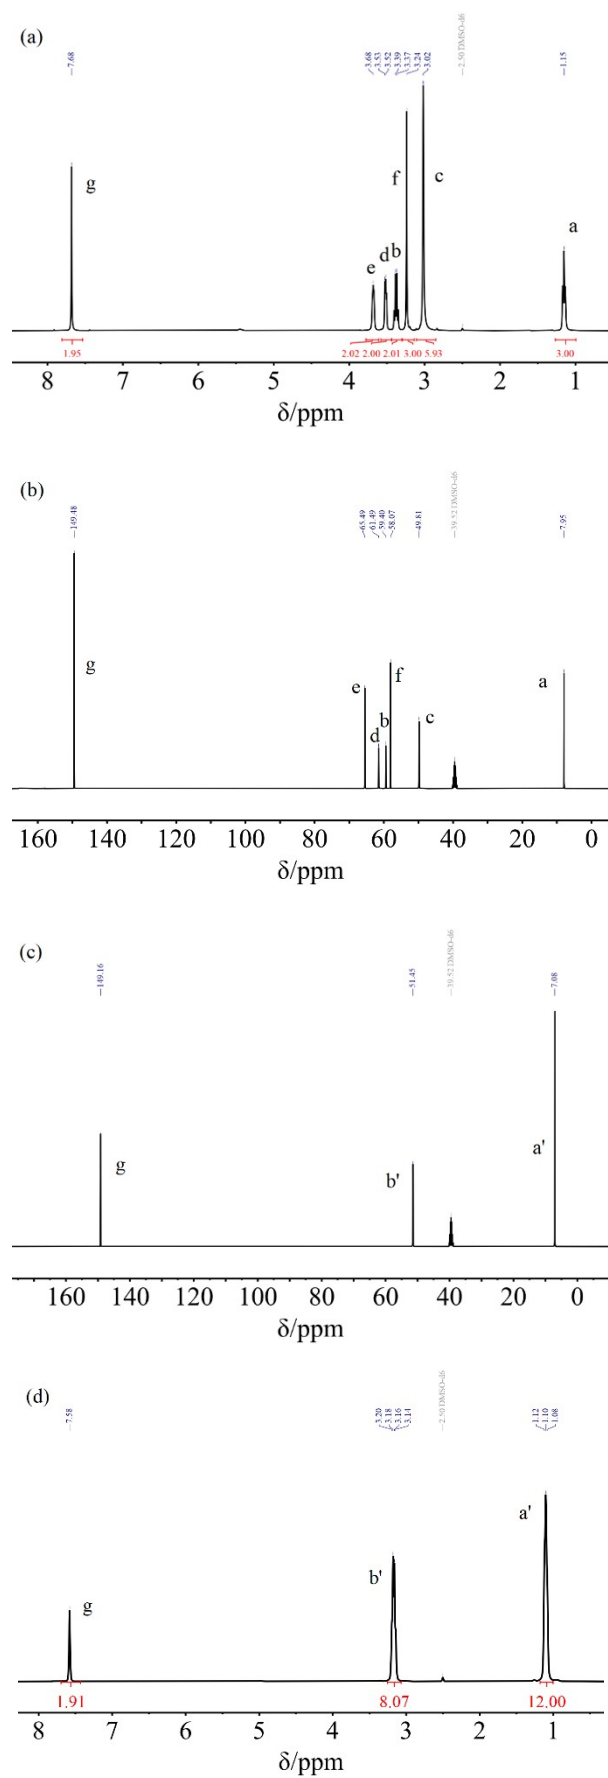

**Fig. S1** The NMR spectra of [MOEN<sub>211</sub>][Triz] (a and b) and [N<sub>2222</sub>][Triz] (c and d) in DMSO-*d*<sub>6</sub>.

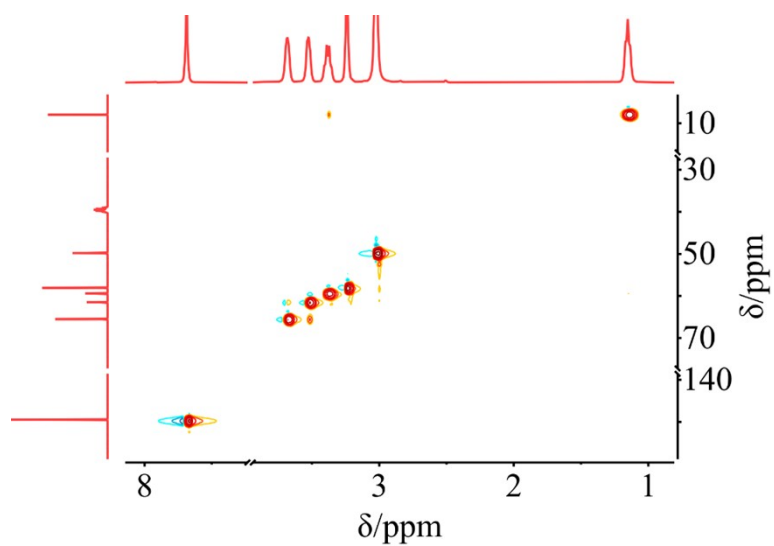

**Fig. S2** The  $^1\text{H}$ - $^{13}\text{C}$  HSQC NMR spectra of  $[\text{MOEN}_{211}][\text{Triz}]$  in  $\text{DMSO-}d_6$ .

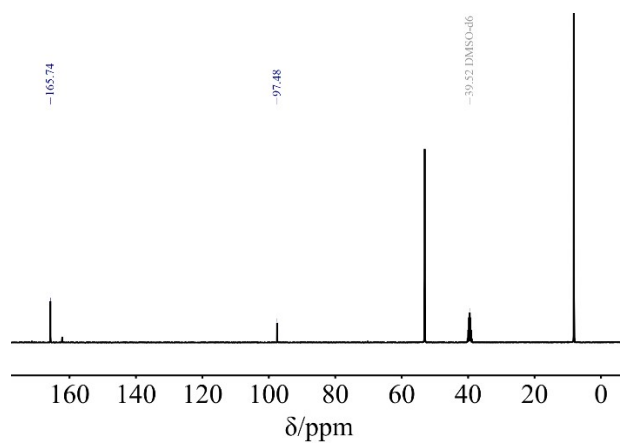

**Fig. S3** The  $^{13}\text{C}$  NMR spectra of  $[\text{N}_{2222}][\text{Cl}]: \text{CCl}_3\text{COONa}$  (1:1) in the solvent containing  $\text{D}_2\text{O}$  and  $\text{DMSO-}d_6$ .

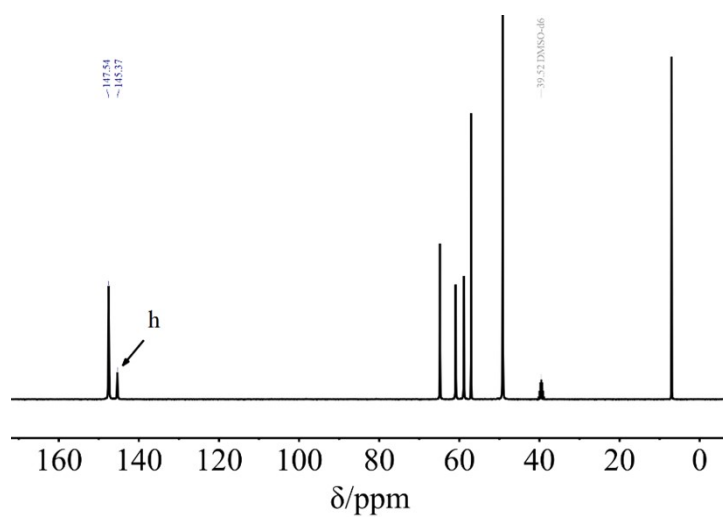

**Fig. S4** The  $^{13}\text{C}$  NMR spectra of  $[\text{MOEN}_{211}][\text{Triz}]+\text{CO}_2$  using  $\text{DMSO-}d_6$  as the external solvent.

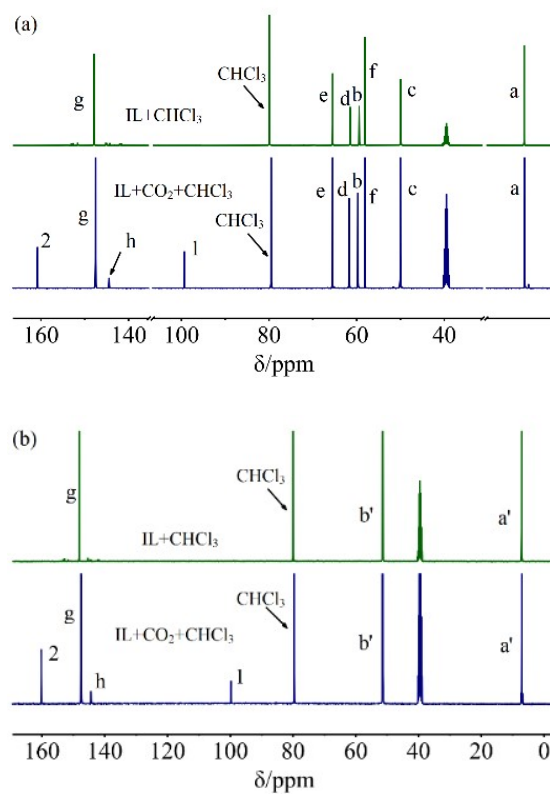

**Fig. S5** The  $^{13}\text{C}$  NMR spectra of  $[\text{MOEN}_{211}][\text{Triz}]+\text{CHCl}_3$  (a) and  $[\text{N}_{2222}][\text{Triz}]+\text{CHCl}_3$  (b) with and without  $\text{CO}_2$  in  $\text{DMSO}-d_6$ .

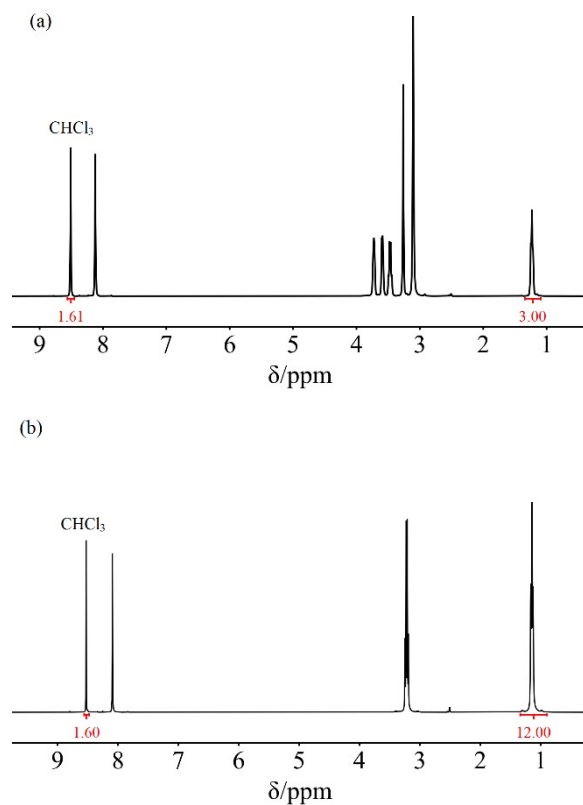

**Fig. S6** The  $^1\text{H}$  NMR spectra of  $[\text{MOEN}_{211}][\text{Triz}]+\text{CO}_2+\text{CHCl}_3$  (a) and  $[\text{N}_{2222}][\text{Triz}]+\text{CO}_2+\text{CHCl}_3$  (b) in  $\text{DMSO}-d_6$ .

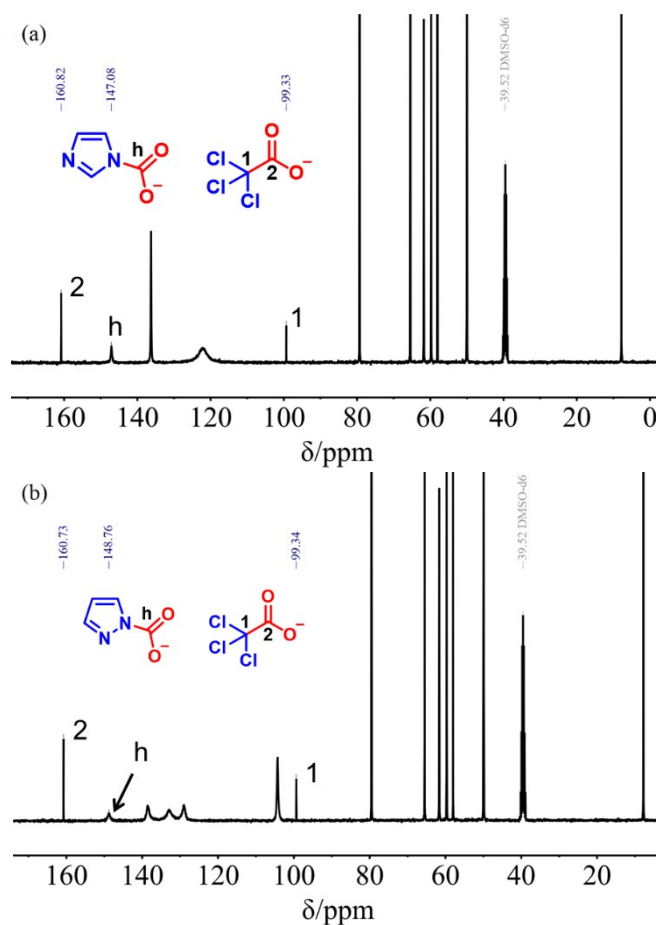

**Fig. S7** The  $^{13}\text{C}$  NMR spectra of [MOEN<sub>211</sub>][Im]+CO<sub>2</sub>+CHCl<sub>3</sub> (a) and [MOEN<sub>211</sub>][Pyr]+CO<sub>2</sub>+CHCl<sub>3</sub> (b).

## References

1. C. Wang, X. Luo, H. Luo, D.-c. Jiang, H. Li and S. Dai, *Angew. Chem. Int. Ed.*, 2011, **50**, 4918-4922.
2. Y. Huang, G. Cui, Y. Zhao, H. Wang, Z. Li, S. Dai and J. Wang, *Angew. Chem. Int. Ed.*, 2017, **56**, 13293-13297.
3. D. Yang, M. Lv and J. Chen, *Chem. Commun.*, 2019, **55**, 12483-12486.
4. M. Chen, Y. Zhou, Q. Lu and D. Yang, *Chem. Commun.*, 2024, **60**, 7061-7064.
